# Supplementary material
Source: MDPI journal article supplement (https://www.mdpi.com/2073-4433/12/8/1065)
Supplement: s1 [file s1]

# Supplementary Materials: Low-Cost Air Quality Stations' Capability to Integrate Reference Stations in Particulate Matter Dynamics Assessment

Lorenzo Brilli <sup>1</sup>, Federico Carotenuto <sup>1,\*</sup>, Bianca Patrizia Andreini <sup>2</sup>, Alice Cavaliere <sup>1</sup>, Andrea Esposito <sup>3</sup>, Beniamino Gioli <sup>1</sup>, Francesca Martelli <sup>1</sup>, Marco Stefanelli <sup>2</sup>, Carolina Vagnoli <sup>1</sup>, Stefania Venturi <sup>4,5</sup>, Alessandro Zaldei <sup>1</sup> and Giovanni Gualtieri <sup>1</sup>

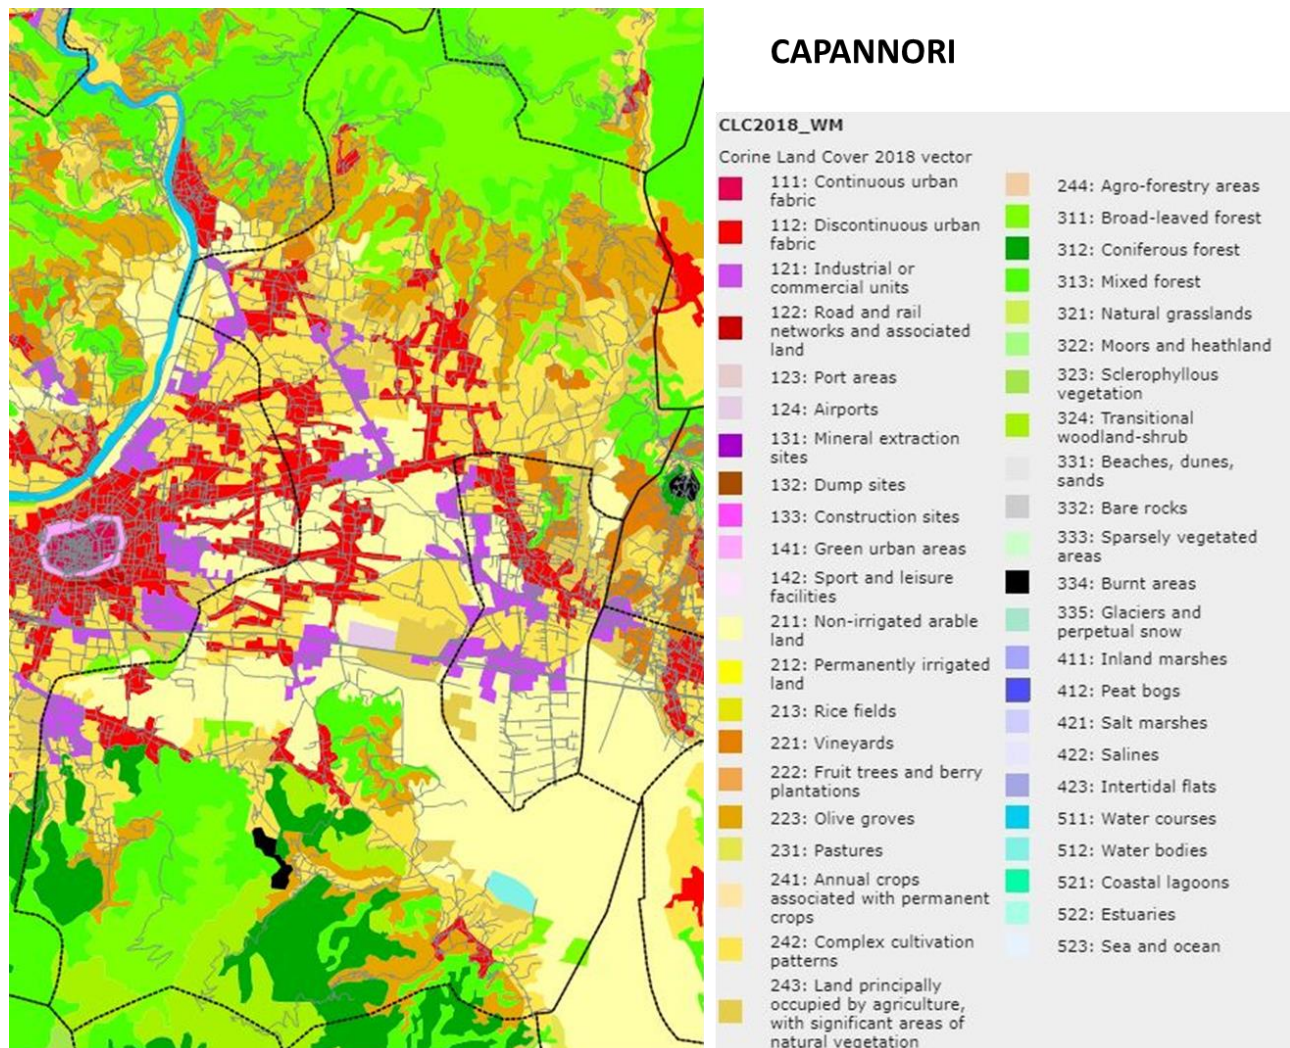

**Figure S1.** Land-use classification of the municipality of Capannori according to the 2018-updated Corine Land Cover classification performed at the highest third disaggregation level (EEA, 2020).

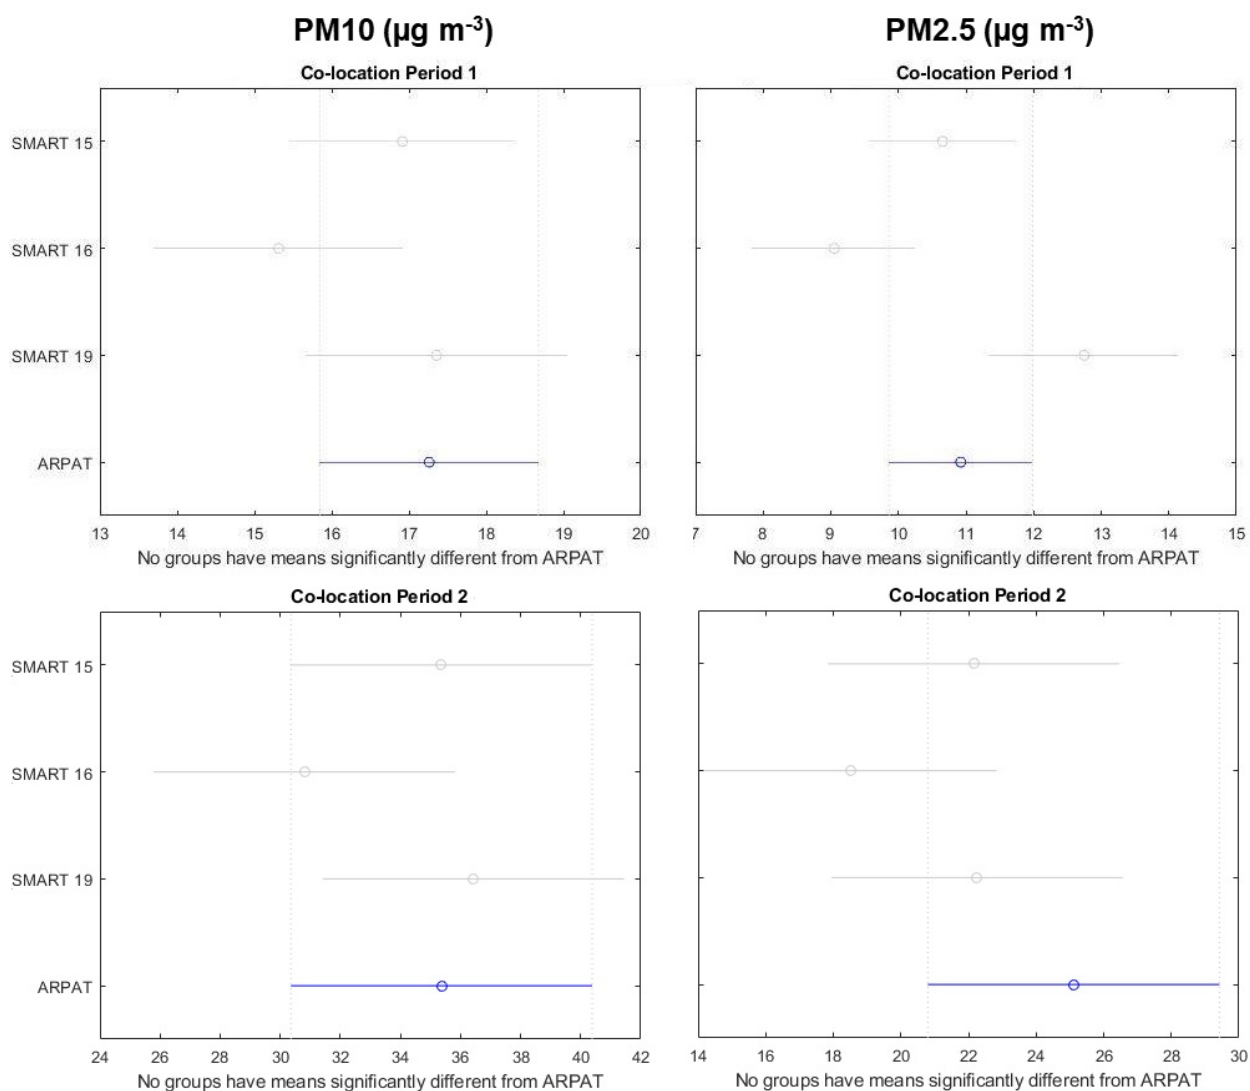

**Figure S2.** Anova analysis during field calibration and field validation processes. No groups showed mean values significantly different from the ARPAT reference station.

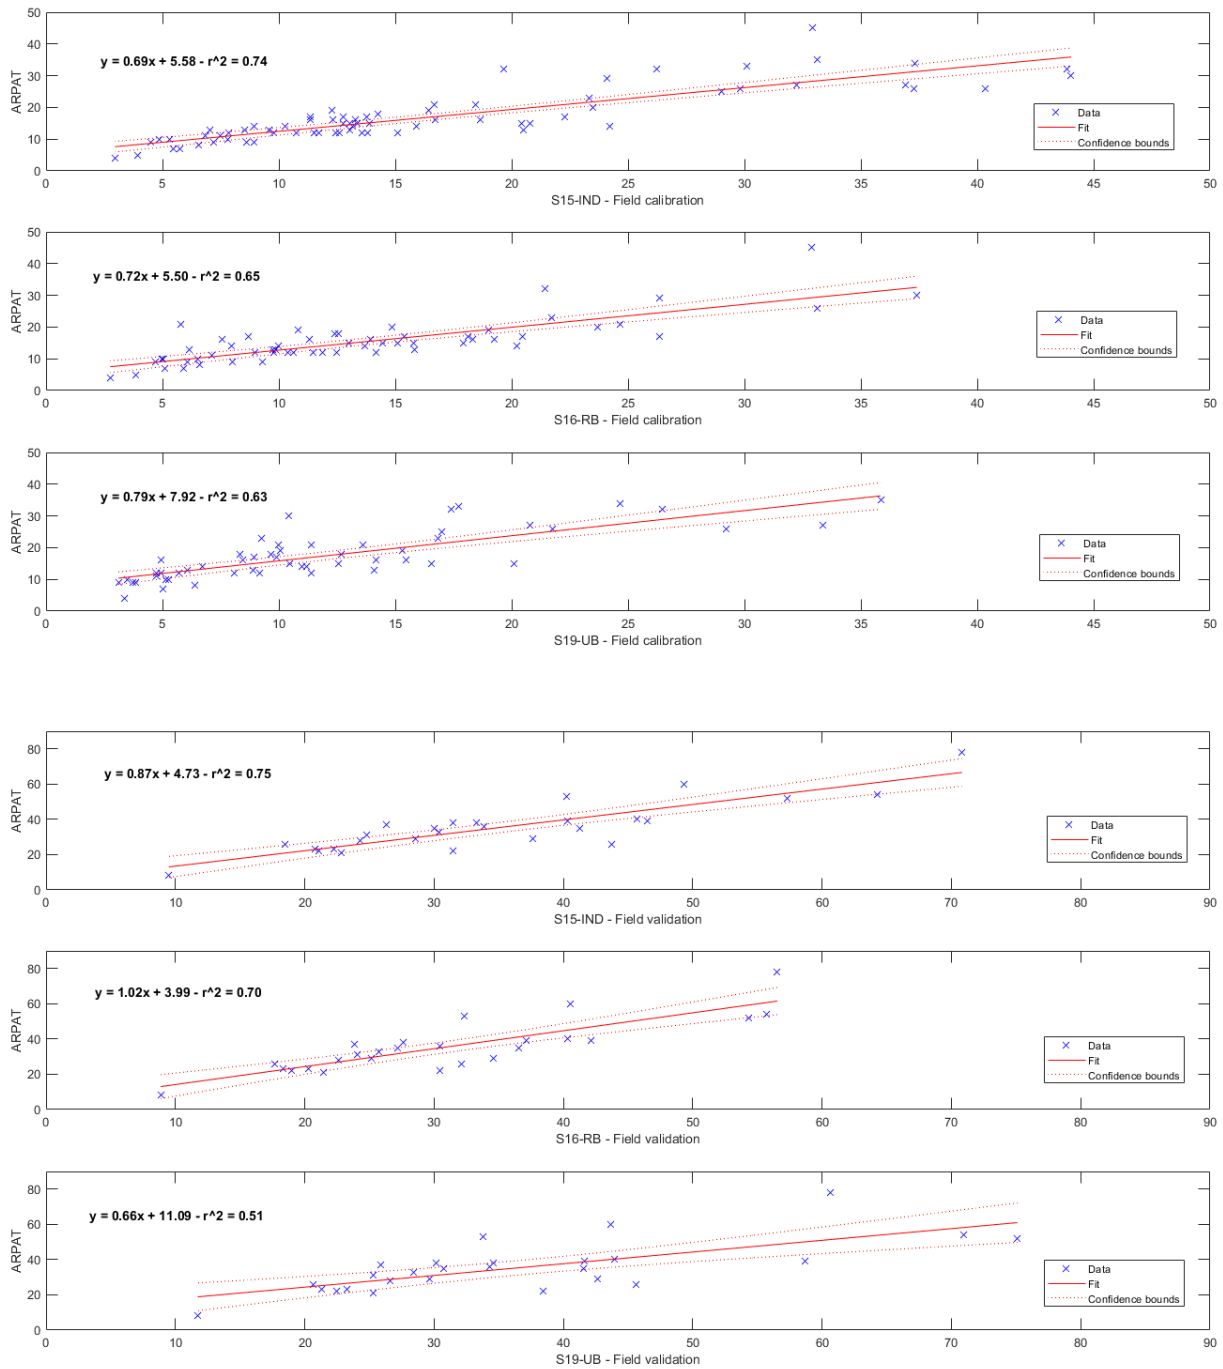

**Figure S3.** Scatterplot of the three AirQino stations (S15-IND, S16-RB, S19-UB) against ARPAT reference station for calibration and validation

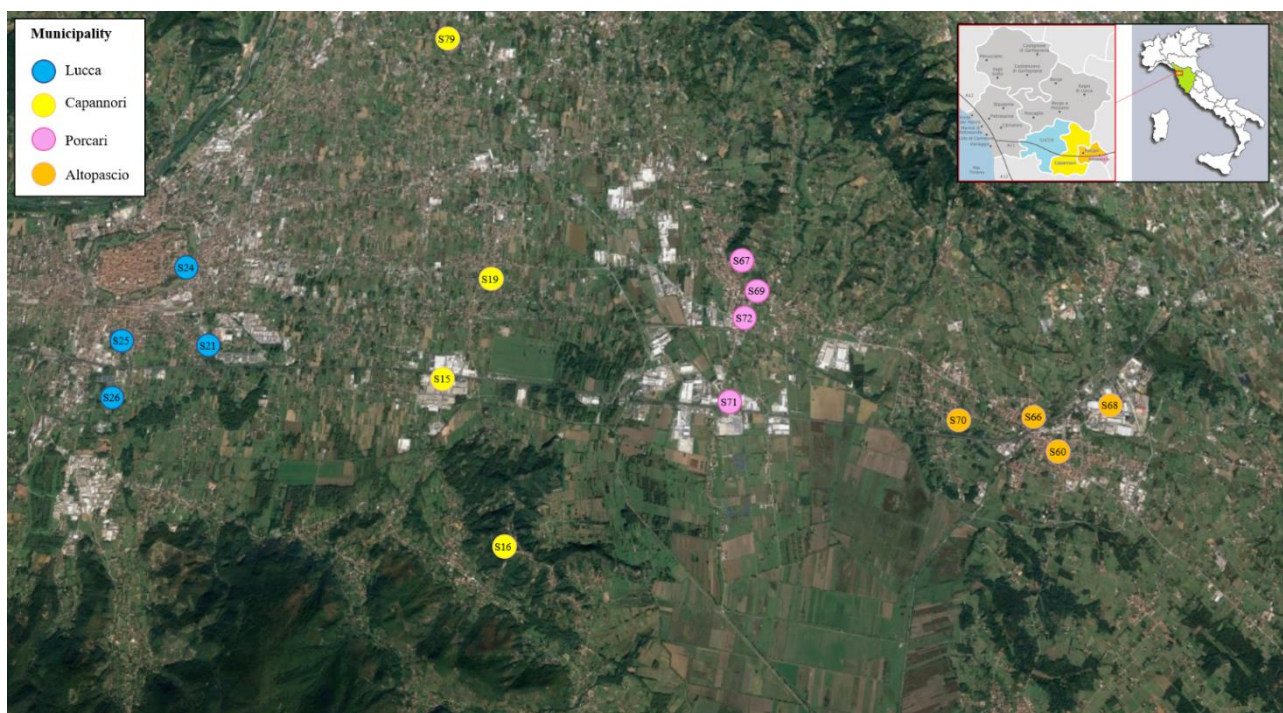

**Figure S4.** Location of the 16 AirQino air quality stations over the valley of Lucca as foreseen by the “VEG-LU-PM10” project. Stations are discriminated by colour depending on the municipality: Lucca (blue), Capannori (yellow), Porcari (pink), and Altupascio (orange).

**Table S1.** Characteristics of air quality stations deployed in the municipality of Capannori and data coverage during the PM<sub>2.5</sub> and PM<sub>10</sub> concentrations monitoring campaign.

| Station name | Latitude<br>(deg N) | Longitude<br>(deg E) | Altitude<br>(m) | Type <sup>a</sup> | Start of activity <sup>b</sup> | End of activity <sup>b</sup> | Number of days | Data coverage (%) |
|--------------|---------------------|----------------------|-----------------|-------------------|--------------------------------|------------------------------|----------------|-------------------|
| S15-IND      | 43°49'2460"         | 10°33'4631"          | 12              | Industrial        | 28/06/2018                     | 15/04/2020                   | 658            | 87.7              |
| S16-RB       | 43°48'06.87"        | 10°34'3932"          | 85              | Rural-Background  | 28/06/2018                     | 15/04/2020                   | 658            | 95.7              |
| S19-UB       | 43°50'2340"         | 10°34'2241"          | 16              | Urban-Background  | 18/01/2018                     | 15/04/2020                   | 819            | 92.4              |
| ARPAT        | 43°50'2340"         | 10°34'2241"          | 16              | Urban-Background  | 18/01/2018                     | 15/04/2020                   | 819            | 98.5              |

<sup>a</sup> Stations are classified based on the 2008/50/EC EU Directive (EC, 2008)

<sup>b</sup> For stations S15-IND and S16-RB, the activity periods do not include the sub-periods when both were co-located by the ARPAT reference station for field calibration and validation purposes (see Tab. 1).



**Table S2** effects of meteorology on low-cost vs. reference sensor PM10 concentrations.

| Field Calibration Period |                    |                |                               |
|--------------------------|--------------------|----------------|-------------------------------|
| Station Name             | Model <sup>a</sup> | R <sup>2</sup> | RMSE ( $\mu\text{g m}^{-3}$ ) |
| S15-IND                  | P                  | 0.74           | 4.21                          |
| S15-IND                  | PTR                | 0.80           | 3.72                          |
| S15-IND                  | TR                 | 0.02           | 8.23                          |
| S16-RB                   | P                  | 0.65           | 4.10                          |
| S16-RB                   | PTR                | 0.79           | 3.25                          |
| S16-RB                   | TR                 | 0.02           | 6.91                          |
| S19-UB                   | P                  | 0.63           | 4.64                          |
| S19-UB                   | PTR                | 0.69           | 4.38                          |
| S19-UB                   | TR                 | 0.25           | 6.50                          |
| Field Validation Period  |                    |                |                               |
| S15-IND                  | P                  | 0.75           | 7.27                          |
| S15-IND                  | PTR                | 0.87           | 5.43                          |
| S15-IND                  | TR                 | 0.51           | 10.51                         |
| S16-RB                   | P                  | 0.70           | 8.02                          |
| S16-RB                   | PTR                | 0.85           | 5.92                          |
| S16-RB                   | TR                 | 0.51           | 10.44                         |
| S19-UB                   | P                  | 0.51           | 10.31                         |
| S19-UB                   | PTR                | 0.76           | 7.56                          |
| S19-UB                   | TR                 | 0.51           | 10.48                         |

<sup>a</sup> Letters indicated the different kind of linear regression model: P is for PM10 only (i.e.: Station PM10 vs. ARPAT PM10); PTR is for PM10, Temperature and Relative Humidity (i.e.: Station PM10, Temperature and Relative Humidity vs. ARPAT PM10) and TR for Temperature and Relative Humidity only (i.e.: Station Temperature and Relative Humidity vs. ARPAT PM10).

**Table S3** correlation coefficients for linear regression between PM10 percentage errors vs. Temperature (T) and Relative Humidity (RH).

| Station Name | r <sup>2</sup> for PM10 % error vs. T | r <sup>2</sup> for PM10 % errors vs. RH |
|--------------|---------------------------------------|-----------------------------------------|
| S15-IND      | 0.01                                  | 0.01                                    |
| S16-RB       | 0.06                                  | 0.20                                    |
| S19-UB       | 0.07                                  | 0.23                                    |
